# Supplementary material
Source: PubMed Central journal article supplement (PMC1310565)
Supplement: plntphys_pp.105.070722_1.pdf [file plntphys_pp.105.070722_1.pdf]

**Supplement Table I.** Number of ESTs from 12 cDNA libraries of normal wheat life cycles

| Tissue                            | No. of ESTs |                               |              |       |               |
|-----------------------------------|-------------|-------------------------------|--------------|-------|---------------|
|                                   | Total       | $\alpha/\beta$ -gliadin genes | LMW-GS genes | GAPDH | cyclophilin A |
| Crown                             | 10,069      | 0                             | 0            | 12    | 21            |
| Root                              | 10,502      | 0                             | 0            | 29    | 29            |
| Young spikelet at early flowering | 11,072      | 0                             | 0            | 26    | 28            |
| Young spikelet at late flowering  | 12,030      | 0                             | 0            | 9     | 13            |
| Spike at booting stage            | 14,770      | 0                             | 0            | 11    | 26            |
| Spike at heading date             | 11,285      | 0                             | 1            | 5     | 18            |
| Pistil at heading date            | 10,349      | 1                             | 0            | 21    | 1             |
| Spike at flowering date           | 12,300      | 0                             | 0            | 11    | 20            |
| Seed at DPA5                      | 10,461      | 0                             | 0            | 27    | 18            |
| Seed at DPA10                     | 11,282      | 466                           | 322          | 28    | 12            |
| Seed at DPA20                     | 11,308      | 471                           | 90           | 20    | 10            |
| Seed at DPA30                     | 12,573      | 71                            | 56           | 17    | 21            |
| Total                             |             | 1,008                         | 468          | 250   | 215           |

DPA; days post-anthesis, GAPDH; glyceraldehydes-3-phosphate dehydrogenase
